# Supplementary material for: The approved pediatric drug suramin identified as a clinical candidate for the treatment of EV71 infection—suramin inhibits EV71 infection in vitro and in vivo
Source: PubMed Central journal article supplement (PMC4185360; doi:10.1038/emi.2014.60), 2014-09-03
Supplement: emi201460x1.pdf [file emi201460x1.pdf]

**Supplementary Table S1** CYP inhibition assay for suramin

| <b>Conc</b><br><b>(<math>\mu</math>M)</b> | <b>1A2</b> |                  | <b>2C9</b> |                  | <b>2C19</b> |                  | <b>2D6</b> |                  | <b>3A4</b> |                  |
|-------------------------------------------|------------|------------------|------------|------------------|-------------|------------------|------------|------------------|------------|------------------|
|                                           | Inhibition | IC <sub>50</sub> | Inhibition | IC <sub>50</sub> | Inhibition  | IC <sub>50</sub> | Inhibition | IC <sub>50</sub> | Inhibition | IC <sub>50</sub> |
|                                           |            | ( $\mu$ M)       |            | ( $\mu$ M)       |             | ( $\mu$ M)       |            | ( $\mu$ M)       |            | ( $\mu$ M)       |
| 100                                       | 89%        | 12.3             | 32%        | >100             | 56%         | 78.9             | 49%        | >100             | 34%        | >100             |
| 30                                        | 70%        | 12.7             | 8%         | >100             | 34%         | 58.9             | 40%        | 45.5             | 16%        | >100             |
| 10                                        | 40%        | 15.1             | 0%         | //               | 15%         | 56.9             | 7%         | >100             | 5%         | >100             |
