# Supplementary material for: The approved pediatric drug suramin identified as a clinical candidate for the treatment of EV71 infection—suramin inhibits EV71 infection in vitro and in vivo
Source: PubMed Central journal article supplement (PMC4185360; doi:10.1038/emi.2014.60), 2014-09-03
Supplement: emi201460x2.pdf [file emi201460x2.pdf]

**Supplementary Table S2** hERG channel inhibition by suramin

---

| <b>Compound</b>      | <b>IC<sub>50</sub>_hERG (μM)</b> |
|----------------------|----------------------------------|
| <b>Amitriptyline</b> | 4.04                             |
| <b>Suramin</b>       | >1000.00                         |

---
