# Supplementary material for: The approved pediatric drug suramin identified as a clinical candidate for the treatment of EV71 infection—suramin inhibits EV71 infection in vitro and in vivo
Source: PubMed Central journal article supplement (PMC4185360; doi:10.1038/emi.2014.60), 2014-09-03
Supplement: emi201460x3.pdf [file emi201460x3.pdf]

**Supplementary Table S3** Individual and mean pharmacokinetic parameters of surmanin following single intravenous bolus administration of suramin at 4.37mg/kg to male cynolmolgus monkeys

| Animal | Cmax    | Tmax | C0      | T1/2   | Vdss   | Cl          | AUC0-last | AUC0-inf  |
|--------|---------|------|---------|--------|--------|-------------|-----------|-----------|
| ID     | (ng/mL) | (h)  | (ng/mL) | (h)    | (L/kg) | (mL/min/kg) | (ng·h/mL) | (ng·h/mL) |
| P101   | 169000  | 0.08 | 143000  | 69.06  | 0.176  | 0.0371      | 1660000   | 1960000   |
| P102   | 117000  | 0.08 | 96300   | 112.49 | 0.212  | 0.0303      | 1810000   | 2400000   |
| P103   | 141000  | 0.03 | 146000  | 130.31 | 0.210  | 0.0278      | 1930000   | 2620000   |
| Mean   | 142333  | 0.06 | 128433  | 103.95 | 0.199  | 0.0317      | 1800000   | 2326667   |
| SD     | 26026   | 0.03 | 27869   | 31.50  | 0.0202 | 0.00481     | 135277    | 336056    |
| CV (%) | 18.3    | 45.6 | 21.7    | 30.3   | 10.1   | 15.2        | 7.52      | 14.4      |

# The linear regression coefficient of the concentration values on the terminal phase is less than 0.9. t1/2 might not be accurately estimated.
