# Supplementary material for: The approved pediatric drug suramin identified as a clinical candidate for the treatment of EV71 infection—suramin inhibits EV71 infection in vitro and in vivo
Source: PubMed Central journal article supplement (PMC4185360; doi:10.1038/emi.2014.60), 2014-09-03
Supplement: emi201460x4.pdf [file emi201460x4.pdf]

**Supplementary Table S4** Individual and mean plasma concentration of suramin following single intravenous bolus administration of suramin at 4.37mg/kg to male cynomolgus monkeys.

| Time (h) | Conc. (µM) |       |        |        |
|----------|------------|-------|--------|--------|
|          | P101       | P102  | P103   | Mean   |
| 0        | BQL        | BQL   | BQL    | BQL    |
| 0.033    | 110.00     | 74.20 | 109.00 | 97.73  |
| 0.083    | 130.00     | 90.50 | 104.00 | 108.17 |
| 0.25     | 103.00     | 79.90 | 93.10  | 92.00  |
| 0.5      | 103.00     | 82.10 | 92.30  | 92.47  |
| 1        | 77.80      | 66.70 | 85.50  | 76.67  |
| 3        | 54.00      | 48.90 | 53.80  | 52.23  |
| 6        | 32.20      | 35.20 | 37.10  | 34.83  |
| 9        | 18.30      | 23.20 | 25.80  | 22.43  |
| 24       | 9.83       | 11.30 | 11.60  | 10.91  |
| 48       | 6.20       | 7.11  | 8.61   | 7.31   |
| 72       | 4.38       | 5.55  | 5.31   | 5.08   |
| 96       | 3.39       | 4.44  | 4.18   | 4.00   |
| 120      | 3.74       | 3.79  | 3.64   | 3.72   |
| 144      | 3.42       | 3.23  | 3.16   | 3.27   |
| 168      | 2.31       | 2.82  | 2.82   | 2.65   |

Note: BQL- Below the lower limit of quantitation (LLOQ).
