# Supplementary material for: The approved pediatric drug suramin identified as a clinical candidate for the treatment of EV71 infection—suramin inhibits EV71 infection in vitro and in vivo
Source: PubMed Central journal article supplement (PMC4185360; doi:10.1038/emi.2014.60), 2014-09-03
Supplement: emi201460x6.pdf [file emi201460x6.pdf]

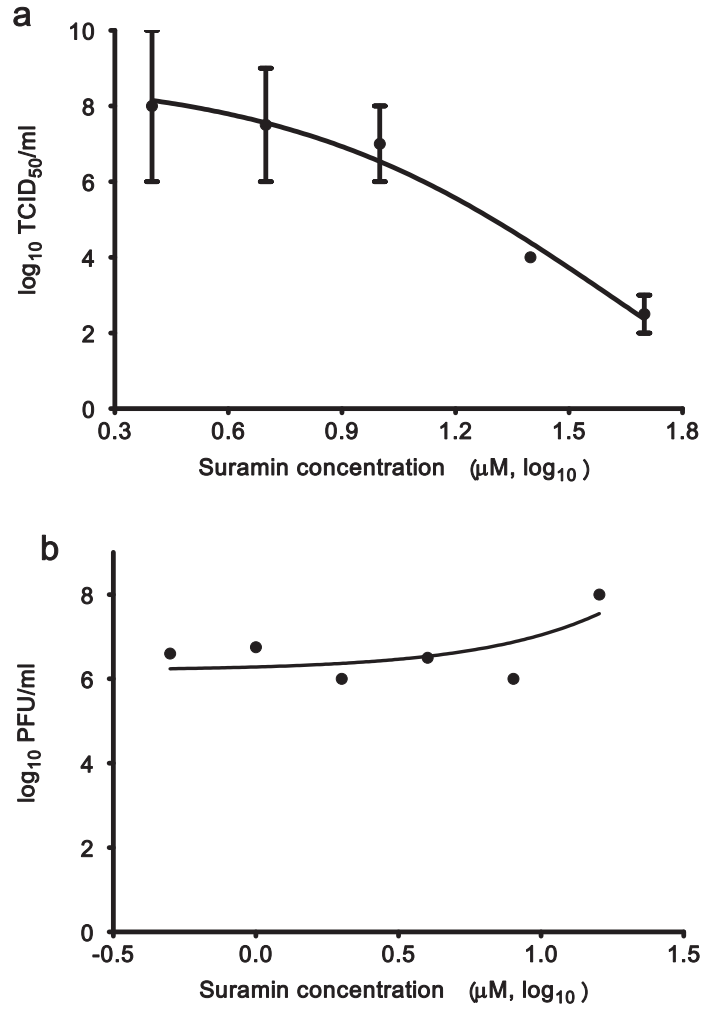

**Supplementary Figure S2** Antiviral profile of suramin. (a) Suramin reduces CVA16 infectivity.

Test was replicated, and the data represents the means  $\pm$  SEM of results. (b) Poliovirus-1 is not inhibited by suramin. Data represents the result of single test.
