# Supplementary material for: The approved pediatric drug suramin identified as a clinical candidate for the treatment of EV71 infection—suramin inhibits EV71 infection in vitro and in vivo
Source: PubMed Central journal article supplement (PMC4185360; doi:10.1038/emi.2014.60), 2014-09-03
Supplement: emi201460x7.pdf [file emi201460x7.pdf]

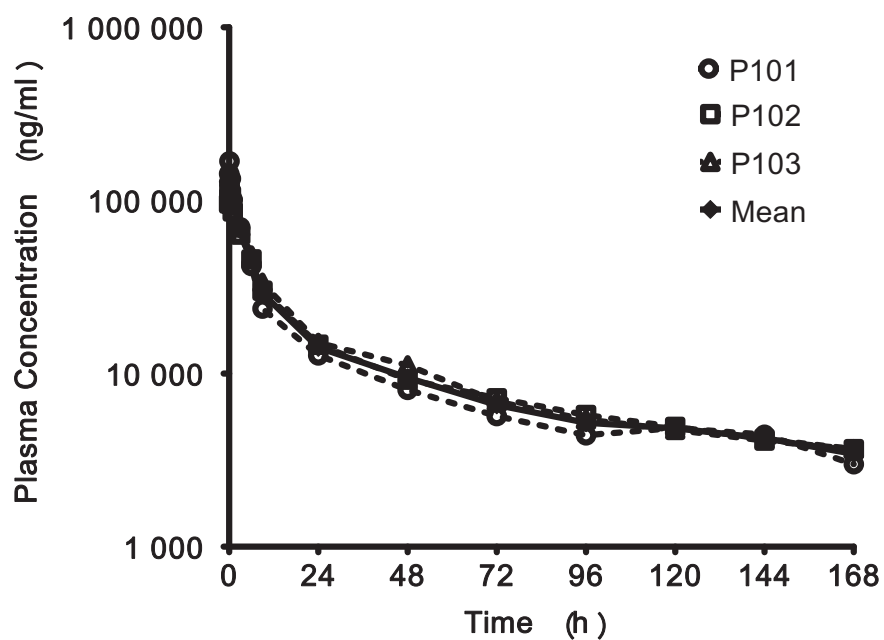

**Supplementary Figure S3** Individual and mean plasma concentrations versus time profile of suramin following intravenous bolus administration of suramin at 4.37 mg/kg to male cynomolgus monkeys. Three monkeys were included, and were labeled as P101, P102 and P103 respectively.
